# Supplementary material for: IL1R1+ cancer-associated fibroblasts drive tumor development and immunosuppression in colorectal cancer
Source: PubMed Central journal article supplement (PMC10352362; doi:10.1038/s41467-023-39953-w), 2023-07-17
Supplement: 41467_2023_39953_MOESM3_ESM.pdf [file 41467_2023_39953_MOESM3_ESM.pdf]

## **Description of Additional Supplementary Files**

Title: Supplementary Data 1

Description: Metadata of the human datasets used in this study
