# Supplementary material for: IL1R1+ cancer-associated fibroblasts drive tumor development and immunosuppression in colorectal cancer
Source: Nat Commun. 2023 Jul 17;14:4251. doi: 10.1038/s41467-023-39953-w (PMC10352362; doi:10.1038/s41467-023-39953-w)
Supplement: Supplementary file 1 — Supplementary Information [file 41467_2023_39953_MOESM1_ESM.pdf]

## SUPPLEMENTARY INFORMATION Koncina et al.

### **IL1R1<sup>+</sup> cancer-associated fibroblasts drive tumor development and immunosuppression in colorectal cancer**

Koncina E.<sup>1\*</sup>, Nurmik M.<sup>1\*</sup>, Pozdeev V.I.<sup>1\*</sup>, Gilson C.<sup>1</sup>, Tsenkova M.<sup>1</sup>, Begaj R.<sup>1</sup>, Stang S.<sup>2</sup>, Gaigneaux A.<sup>1</sup>, Weindorfer C.<sup>2</sup>, Rodriguez F.<sup>1</sup>, Schmoetten M.<sup>1</sup>, Klein E.<sup>1</sup>, Karta J.<sup>1</sup>, Atanasova V.S.<sup>2</sup>, Grzyb K.<sup>3</sup>, Ullmann P.<sup>1</sup>, Halder R.<sup>3</sup>, Hengstschläger M.<sup>2</sup>, Graas J.<sup>4</sup>, Augendre V.<sup>5</sup>, Karapetyan Y.<sup>6</sup>, Kerger L.<sup>7</sup>, Zuegel N.<sup>7</sup>, Skupin A.<sup>3</sup>, Haan S.<sup>1</sup>, Meiser J.<sup>8</sup>, Dolznig H.<sup>2§</sup>, Letellier E.<sup>1§#</sup>

<sup>1</sup>Molecular Disease Mechanisms Group, Department of Life Sciences and Medicine, University of Luxembourg, Belval, Luxembourg

<sup>2</sup>Center for Pathobiochemistry and Genetics, Medical University of Vienna, Austria

<sup>3</sup>Luxembourg Centre for Systems Biomedicine, University of Luxembourg, Belval, Luxembourg

<sup>4</sup>Clinical and Epidemiological Investigation Center, Department of Population Health, Luxembourg Institute of Health, Luxembourg

<sup>5</sup>National Center of Pathology, Laboratoire National de Santé, Luxembourg

<sup>6</sup>Integrated BioBank of Luxembourg, Dudelange, Luxembourg

<sup>7</sup>Department of Surgery, Centre Hospitalier Emile Mayrisch, Esch-sur-Alzette, Luxembourg

<sup>8</sup>Cancer Metabolism Group, Department of Cancer Research, Luxembourg Institute of Health, Luxembourg, Luxembourg

\$correspondence to: Elisabeth Letellier, [elisabeth.letellier@uni.lu](mailto:elisabeth.letellier@uni.lu) and Helmut Dolznig, [helmut.dolznig@meduniwien.ac.at](mailto:helmut.dolznig@meduniwien.ac.at)

#lead author: Elisabeth Letellier, [elisabeth.letellier@uni.lu](mailto:elisabeth.letellier@uni.lu)

\*These authors contributed equally

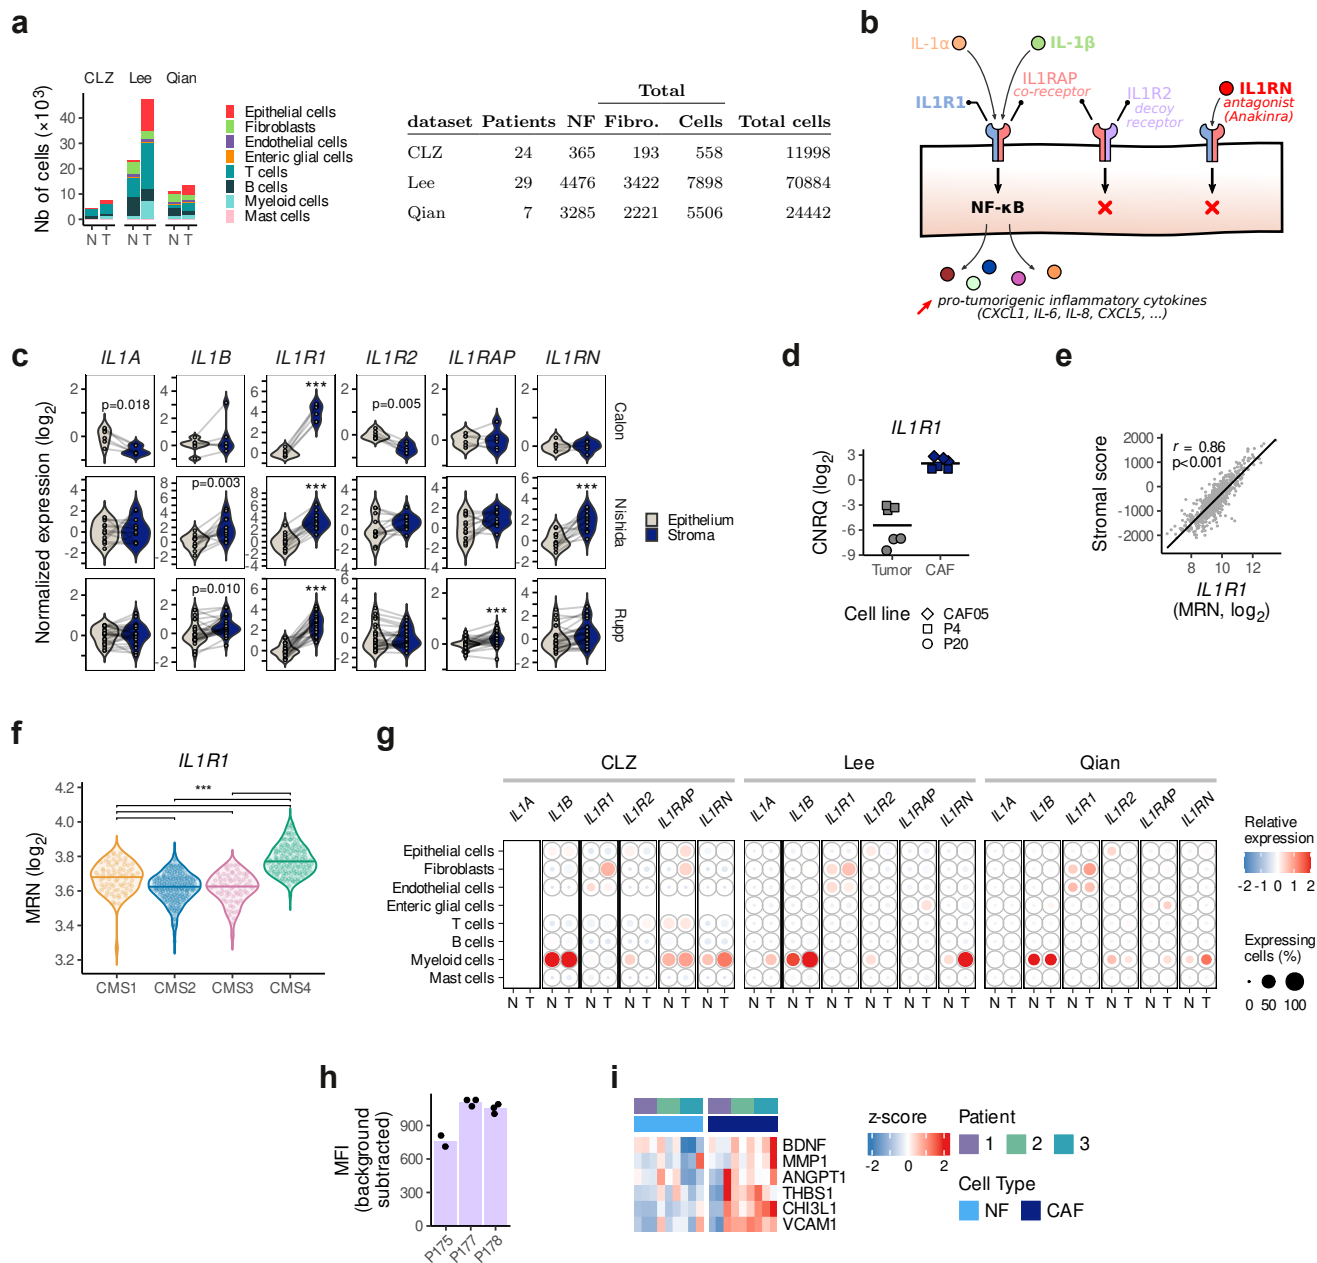

**Supplementary Figure 1 – Expression of the IL1 pathway members in CRC.** **a** Proportion of cells in normal and tumor tissue in each dataset (left barchart) and number of total cells as well as normal and tumor fibroblasts identified in each of the 3 scRNA-Seq datasets (right table). **b** Components of the IL-1-family showing their functional characteristics, both ligands IL-1 $\alpha$  and IL-1 $\beta$  as well as the IL1RN antagonist. **c** Gene expression of IL-1-family members in tumor stroma and tumor epithelium in the Calon (n=6), Nishida (n=13), and Rupp (n=26) datasets. Statistical differences were determined using two-sided paired t-tests with Holm's correction for multiple comparisons (\*\*\*,  $p < 0.001$ ). **d** *IL1R1* expression in primary cultures of patient derived CAFs and tumor spheroids (from P4 and P20, as well as the commercially available CAF05 cell line). Values represent calibrated normalized relative quantities (CNRQ,  $\log_2$ ). **e** Correlation between the ESTIMATE stromal score and *IL1R1* expression in the n=624 human TCGA CRC samples. The Pearson's coefficient  $r$  and  $p$ -value are shown. **f** Expression of *IL1R1* in TCGA CRC patients (n=510) according to their CMS subtype. Statistical differences were determined using an ANOVA followed by Holm's adjusted two-sided pairwise t-tests (\*\*\*,  $p < 0.001$ ; brackets show the significantly different pairs). The horizontal lines show the median. **g** Expression of IL-1 family genes in the different cell types from normal (N) and tumor (T) tissue in the three scRNA-seq datasets (CLZ, Lee and Qian). The heatmap color gradient shows the relative expression (mean of scaled normalized counts) and the bubble size shows the percentage of expressing cells. **h** *IL1R1* expression measured by flow cytometry in CAF cultures isolated from 3 distinct patients (characteristics in Supplementary Table 3). **i** NF $\kappa$ B target genes expression in NFs and CAFs from the GSE198697 dataset (matched NF/CAF cultures from n=3 patients). Number of patients per dataset in panels a and g is reported in Supplementary Figure 1a. Source data are provided as a Source Data file.

## Supplementary Figure 2

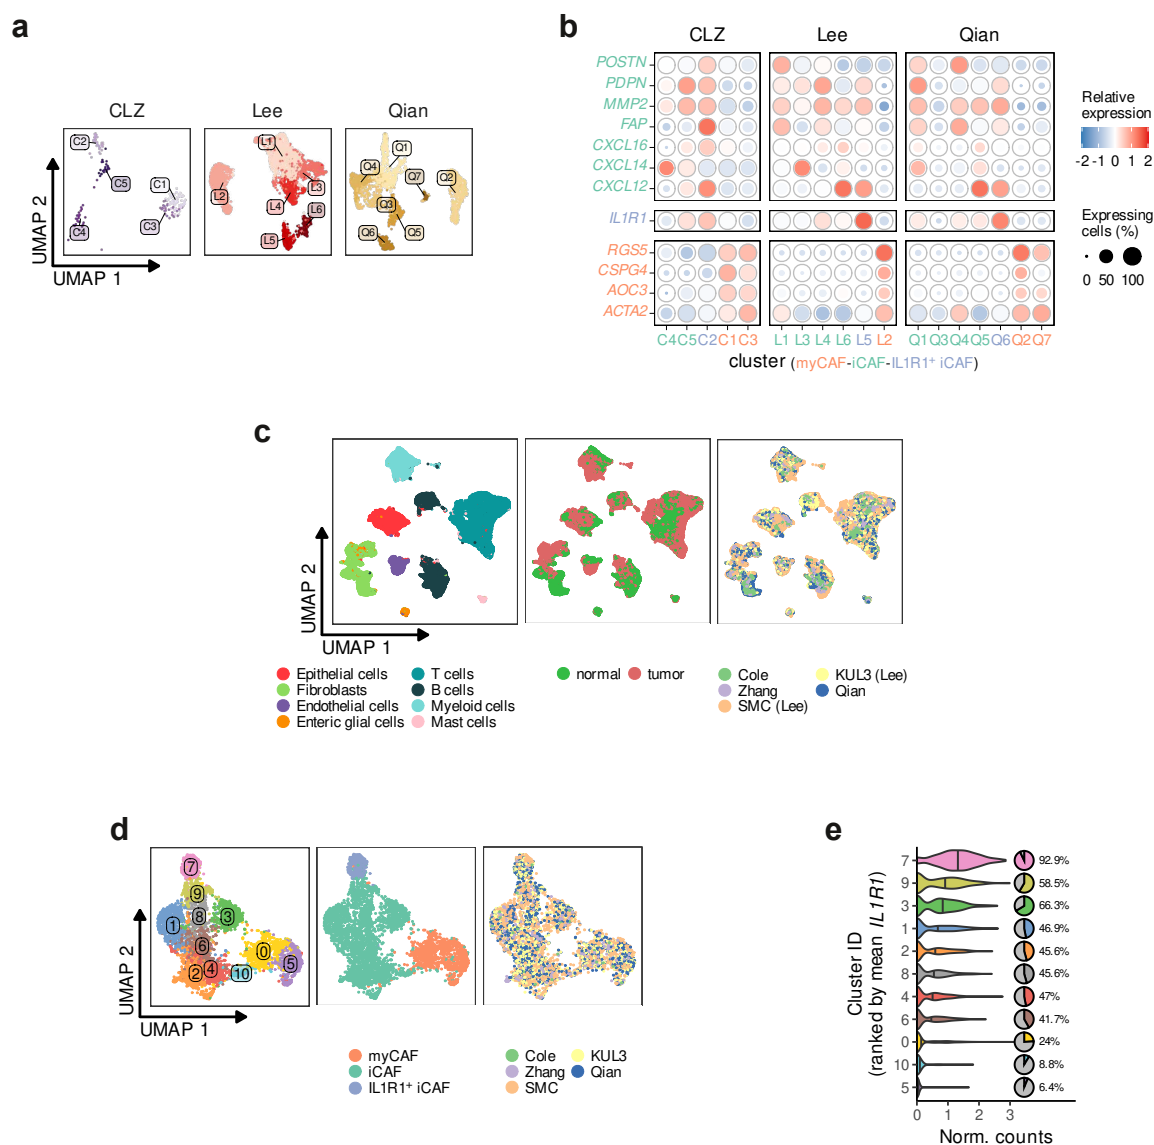

**Supplementary Figure 2 – Single cell sequencing analysis of CAF subtypes in CRC.** **a** UMAP plot showing the individual cell clusters identified in CAFs from the three scRNA-seq datasets (CLZ, Lee and Qian). **b** The different clusters were grouped into myCAF and iCAF based on the expression profile of canonical markers. Expression of *IL1R1* was used to further distinguish *IL1R1*<sup>+</sup> iCAFs from the remaining iCAF clusters. The heatmap color gradient shows the relative expression (mean of scaled normalized counts) and the bubble size the percentage of expressing cells. **c** UMAP plot showing the main cell types identified in the integrated (Cole, Zhang, Lee-SMC, Lee-KUL3 and Qian) dataset (left) and the distribution of normal and tumor tissue (middle) as well as the distribution of the cohorts composing the dataset (right). **d** UMAP plot showing the identified CAF clusters (labelled 0-10) in the integrated dataset (left), the identified iCAF, *IL1R1*<sup>+</sup> iCAF and myCAF group of clusters (middle) and the distribution of the cohorts composing each cluster (right). **e** Violin plot showing *IL1R1* expression and pie charts showing the percentage of *IL1R1* expressing cells in each CAF cluster. Colors represent different clusters and the same color code was used in **d** and **e**. Number of patients per dataset in panels a,b is reported in Supplementary Figure 1a. Source data are provided as a Source Data file.

## Supplementary Figure 3

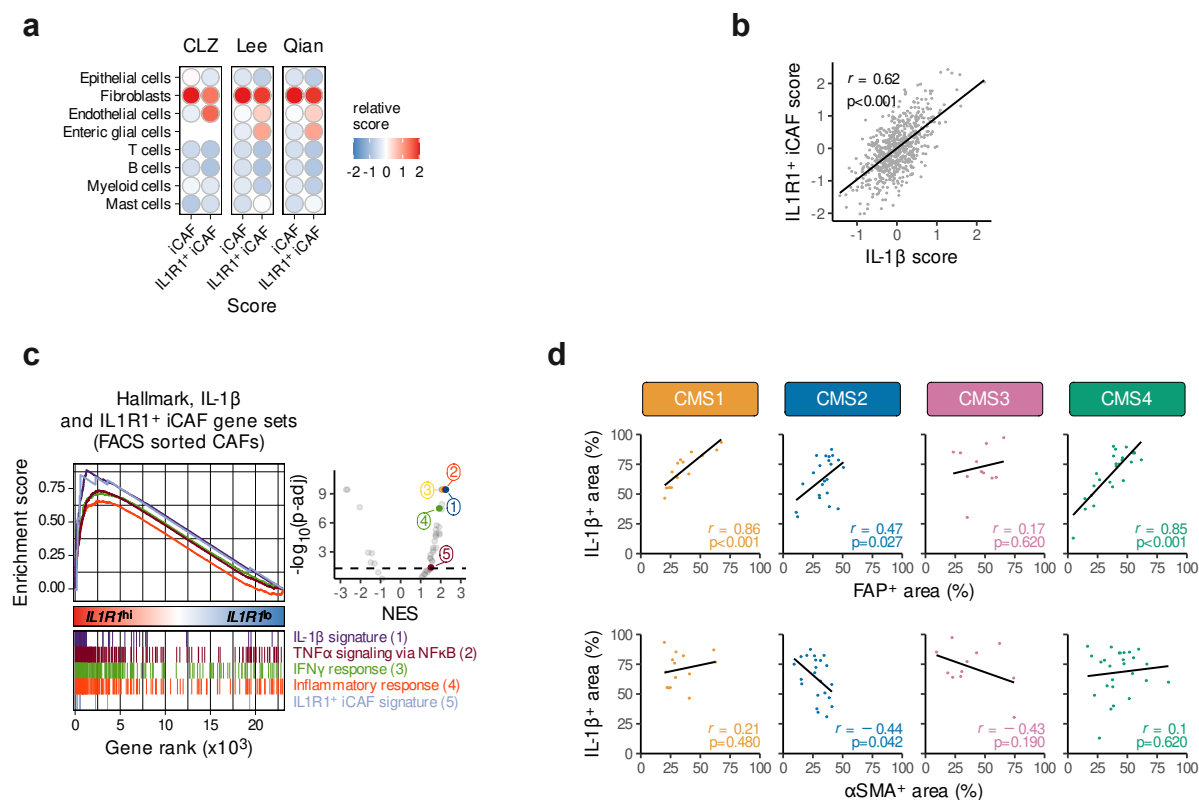

**Supplementary Figure 3 – Characterization of the IL1R1<sup>hi</sup> iCAF subtype in CRC.** **a** Heatmap showing iCAF and IL1R1<sup>hi</sup> iCAFs scores (z-score) in the main cell-types of the three scRNA-seq datasets (CLZ, Lee and Qian, Number of patients per dataset is reported in Supplementary Figure 1a). **b** Correlation between the IL-1 $\beta$  and IL1R1<sup>hi</sup> iCAFs scores in the n=624 human TCGA CRC samples. The Pearson's coefficient  $r$  and  $p$ -value are shown. **c** GSEA of genes expressed differentially between FACS-sorted IL1R1<sup>hi</sup> and IL1R1<sup>lo</sup> CT5.3 cells, n=3 independent experiments. The MSigDB Hallmark gene set extended with our IL-1 $\beta$  and IL1R1<sup>hi</sup> iCAF gene sets were used. Running enrichment scores (ES) of selected gene sets are shown in addition to the volcano plot showing the normalized enrichment scores (NES) and adjusted  $p$ -values for all tested gene sets. **d** Correlation between FAP<sup>+</sup> and IL-1 $\beta$ <sup>+</sup> staining (upper panel) and  $\alpha$ SMA<sup>+</sup> and IL-1 $\beta$ <sup>+</sup> staining (lower panel) after IHC staining on tissue microarray sections of our established in-house CRC cohort and split by CMS (n=73 patients with identified CMS out of the total of 106 available TMAs). Source data are provided as a Source Data file.

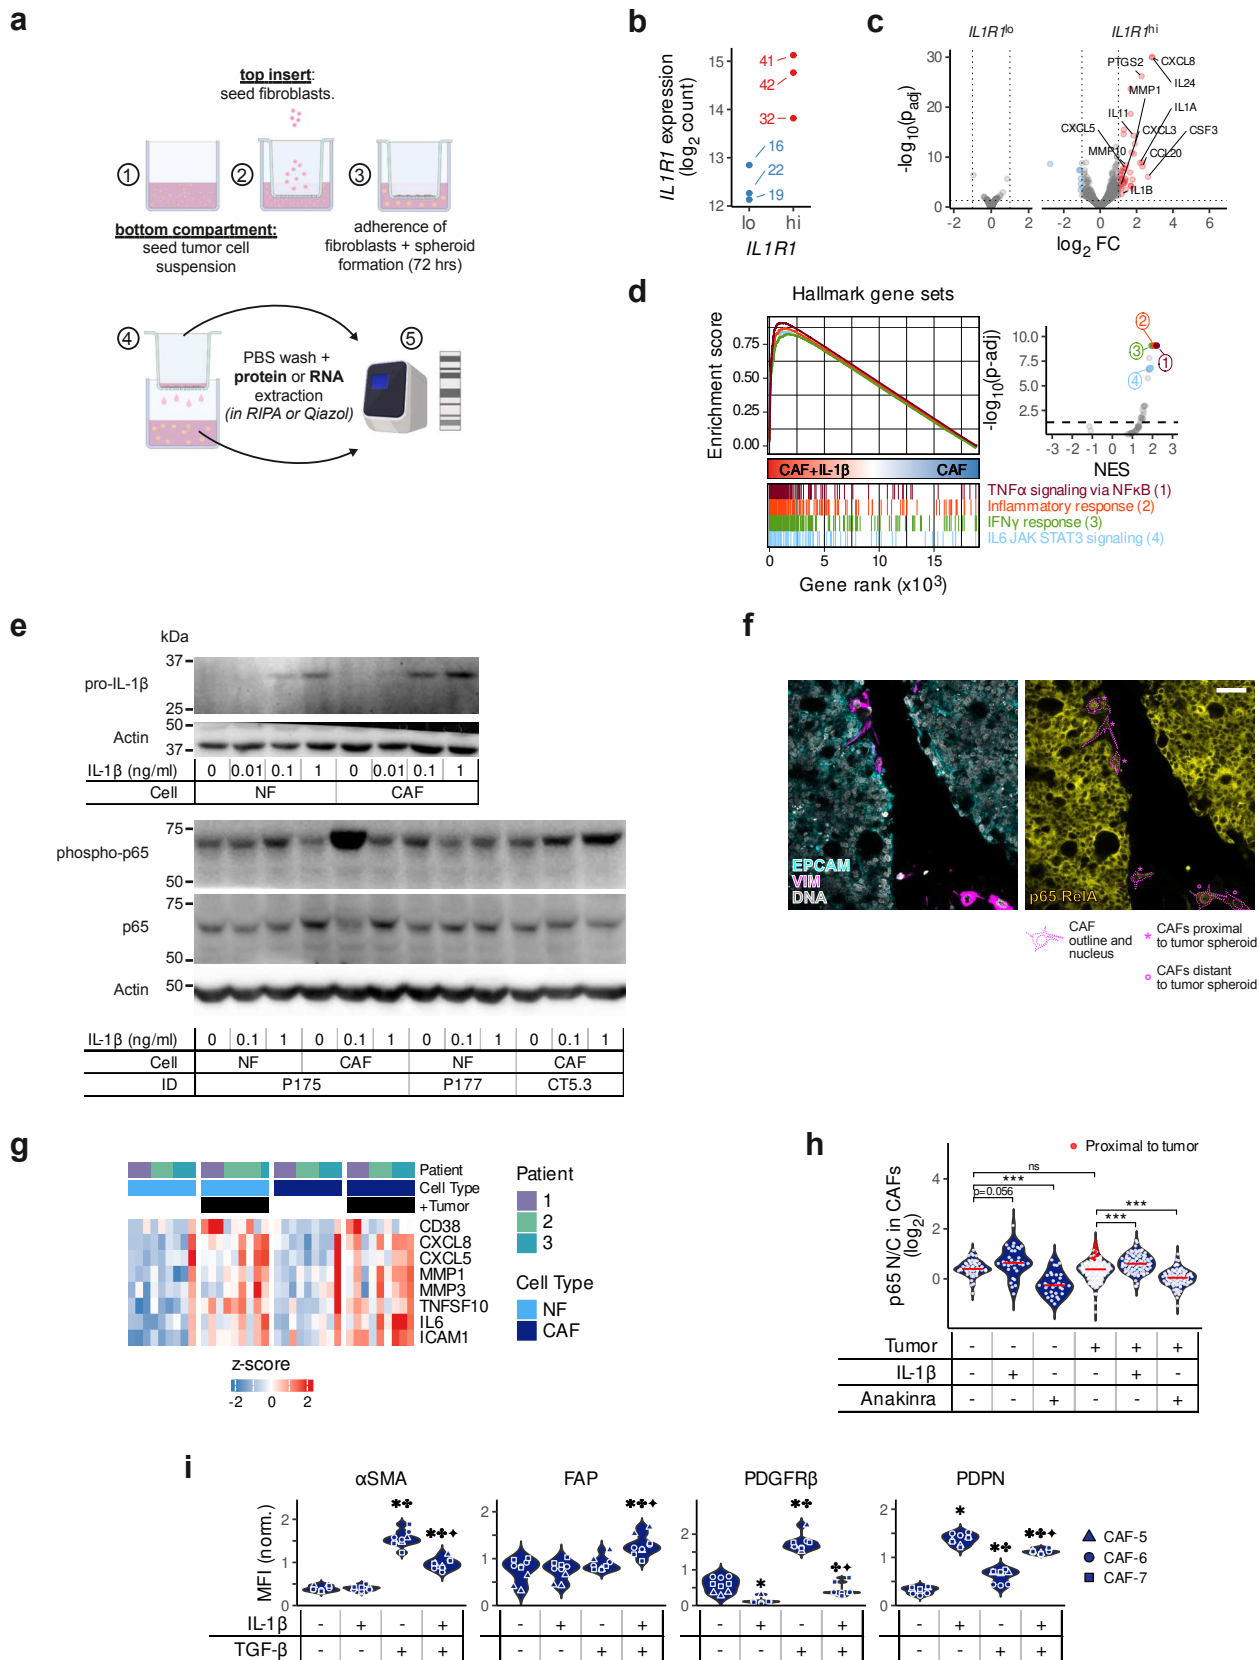

**Supplementary Figure 4 – Pro-tumorigenic effect of the IL1R1<sup>+</sup> iCAF in CRC.** **a** Experimental layout of transwell CAF-tumor co-cultures. Tumor spheroids are seeded in 6-well ultra-low attachment (ULA) plates (1), after which a transwell insert is added and CAFs are seeded into the top compartment (2). After cultivation for 72 hours (3), both compartments can be lysed and collected separately (4) allowing to identify the effect of the co-culture on both cell types independently (5). **b** *IL1R1* expression in CAF cultures from six different patients (in-house cohort) classified into *IL1R1*<sup>hi</sup> (n=3 independent biological replicates from three different patients P32, P41 and P42) and *IL1R1*<sup>lo</sup> (n=3 independent biological replicates from three different patients P16, P19 and P22) based on the median expression level, as assessed by RNA-seq. **c** Volcano plot of genes differentially expressed upon co-culture of either *IL1R1*<sup>lo</sup> (P16, P19, P22) or *IL1R1*<sup>hi</sup> (P32, P41, P42) CAFs with HT-29 tumor spheroids. **d** GSEA of genes differentially expressed in CAFs upon treatment with IL-1β (1 ng/ml). The running enrichment score (ES) for selected gene sets

is shown in addition to the volcano plot showing the normalized enrichment score (NES) and adjusted p-values of all 50 MSigDB Hallmark gene sets. **e** p65, phosphorylated p65, pro-IL-1 $\beta$  and Actin expression in NFs and CAFs (P4) upon IL-1 $\beta$  stimulation (0.01, 0.1 and 1 ng/ml), as assessed by western blotting in two independent experiments with multiple NF/CAF pairs. **f** EPCAM, Vimentin and p65-RelA staining on LS174T tumor organoids and CAF-8 cells. The outlines of CAFs as performed to measure p65-RelA staining intensity are shown (pink outlines on the right panel). CAFs considered proximal (asterisk) and distal (open circles) to tumor organoids are highlighted. Representative experiment out of two independent experiments (Figure 3g). Scale bar = 50  $\mu$ m. **g** Heatmap showing NF $\kappa$ B target genes in NFs and CAFs cultured alone or in presence of tumor organoids in GSE198697 (matched NF/CAF cultures from n=3 patients). **h** p65 nuclear-to-cytoplasmic ratio (N/C) in CAFs. After treating tumor cell (LS174T) – CAF (CAF-7) co-cultures with either IL-1 $\beta$  or Anakinra, ICC staining of p65 was quantified using ImageJ and N/C was calculated. Red dots show CAFs in close proximity to tumor spheroids (<25  $\mu$ m). Tukey post-hoc test following an ANOVA (\*\*\*,  $p < 0.001$ ; ns,  $p \geq 0.05$ ). Representative experiment out of two independent experiments (Figure 3g) **i** CAF phenotype induced by IL-1 $\beta$  and TGF- $\beta$  activation crosstalk. CAFs (primary cultures of CAF-5, CAF-6 and CAF-7, patient characteristics in Supplementary Table 3) were treated with either IL-1 $\beta$  (5 ng/ml), TGF- $\beta$  (5 ng/ml) or both cytokines together and the expression of PDGFR $\beta$ , FAP,  $\alpha$ SMA and PDPN measured by flow cytometry. MFI values obtained on the three different CAFs were normalized (non-centered scaling). Different data point shapes show technical replicates for the three different CAFs. Tukey post-hoc test following a nested ANOVA design (\*/\*/\*/\*:  $p < 0.001$ ; \* vs. untreated control, \* vs. IL-1 $\beta$  treated and \* vs. TGF- $\beta$  treated). Source data are provided as a Source Data file.

# Supplementary Figure 5

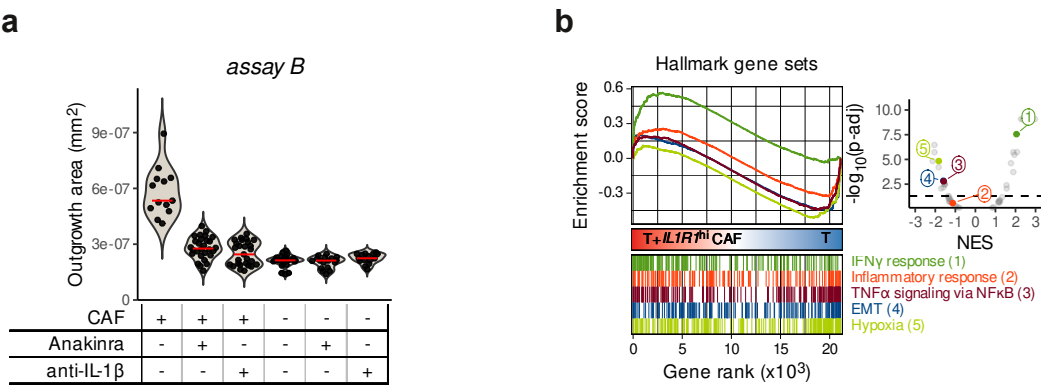

**Supplementary Figure 5 – IL1R1<sup>+</sup> iCAF subtype-induced signaling pathways in tumor cells.** **a** Organotypic encapsulation assay (*assay B* in Fig. 4A) where tumor spheroids (P4) were encapsulated either alone or with CAFs (CT5.3) and treated with anti-IL-1 $\beta$  (100 ng/ml) or Anakinra (100 ng/ml). One representative experiment out of two is shown. **b** MSigDB Hallmark GSEA in tumor spheroids (HT-29) upon co-culture with IL1R1<sup>lo</sup> CAFs. The running enrichment score (ES) for selected gene sets is shown in addition to the volcano plot showing the normalized enrichment score (NES) and adjusted p-values of all 50 MSigDB Hallmark gene sets. Source data are provided as a Source Data file.

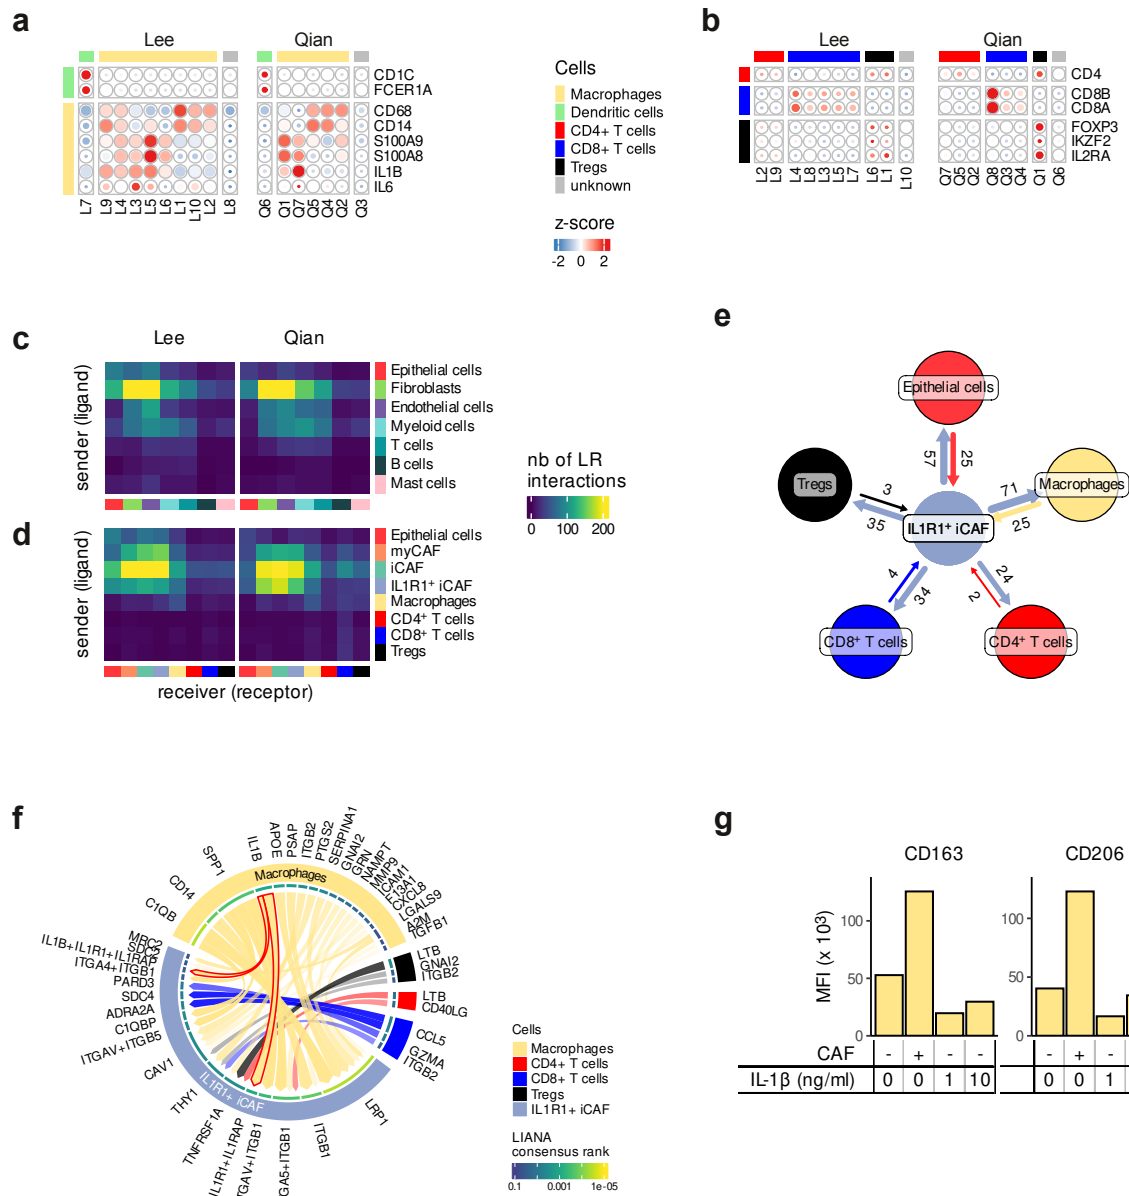

**Supplementary Figure 6 – IL1R1<sup>+</sup> iCAFs immune cell interaction analysis.** **a,b** Tumor myeloid in **a** and T cells in **b** in the Lee and Qian scRNA-Seq datasets were subclustered and labeled based on the expression profile of canonical markers. The heatmap color gradient shows the relative expression (mean of scaled normalized counts) and the bubble size the percentage of expressing cells. **c,d** Ligand-receptor (LR) interactions detected by LIANA between main cell compartments in **c** or between selected subsets in **d** (CAFs, macrophages/monocytes, epithelial cells and T cells) in the Lee and Qian datasets. The heatmap shows the number of distinct LR pairs identified in each cell sender-receiver combination. **e** Potential LR interactions between IL1R1<sup>+</sup> iCAFs and epithelial cells, macrophages and T cells detected by LIANA in the Qian scRNA-seq dataset. **f** Chord diagram showing LR interactions (LIANA aggregate score < 0.05) between ligands borne by immune cells (macrophages, CD4<sup>+</sup> T cells, CD8<sup>+</sup> T cells and Tregs) and receptors borne by IL1R1<sup>+</sup> iCAFs in the Qian scRNA-seq dataset. Arrow thickness and opacity shows higher ranked LIANA scores. Arrows outlined in red highlight the IL1 $\beta$ -IL1R1 pair. **g** Expression of CD163 and CD206 (MFI) on PBMC derived macrophages treated with either 1 or 10 ng/ml IL-1 $\beta$ , or grown in the presence of CAF-3 cells. One representative experiment out of two is shown. Number of patients per dataset in panels a-f is reported in Supplementary Figure 1a. Source data are provided as a Source Data file.

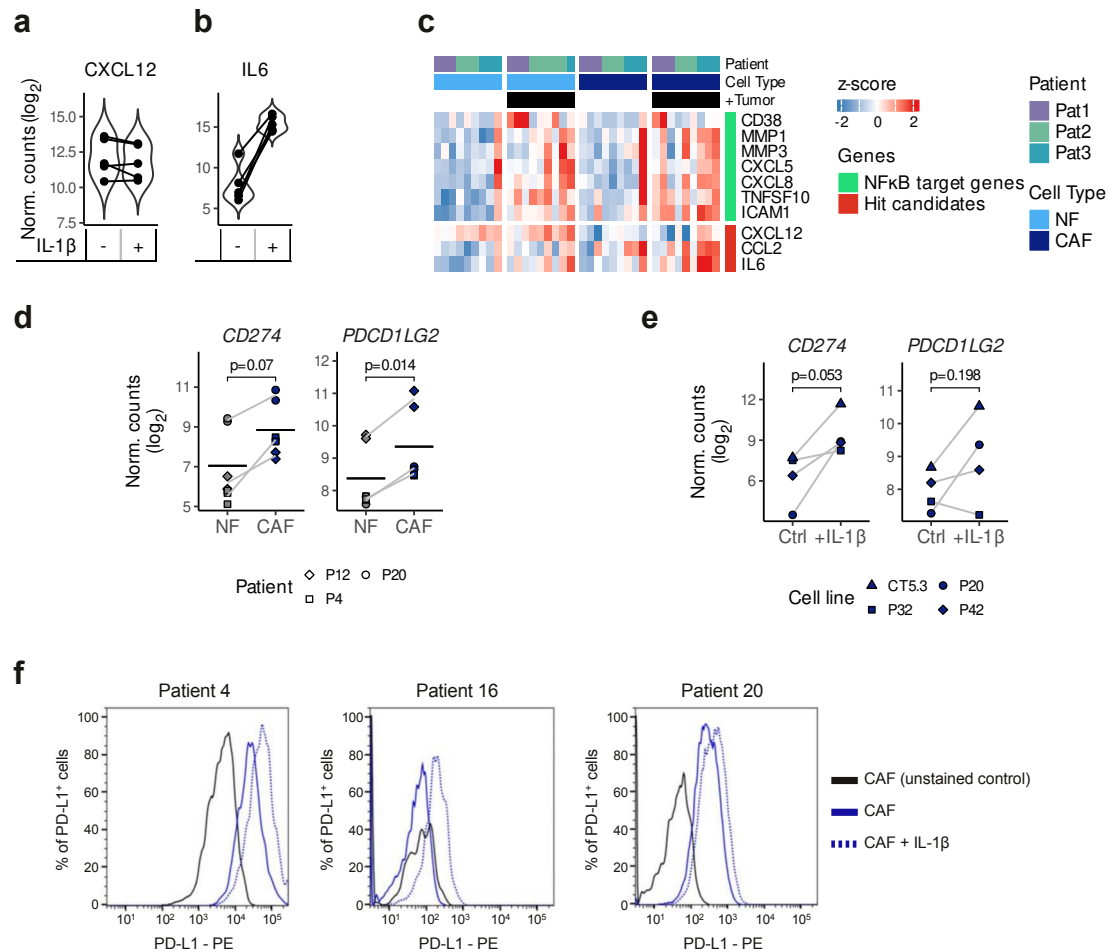

**Supplementary Figure 7 – IL-1 $\beta$  induced signaling in CAFs.** **a,b** Violin plot showing the expression of *CXCL12* in **a** and *IL6* in **b** upon stimulation of fibroblasts with IL-1 $\beta$ . **a,b** represent five independent CAF cultures. **c** Heatmap showing the expression of identified hit candidates and NF $\kappa$ B target genes in NFs and CAFs upon coculture with tumor organoids (GSE198697, matched NF/CAF cultures from n=3 patients). **d** Expression of *CD274* (PD-L1) and *PDCD1LG2* (PD-L2) in paired NFs and CAFs (P4, P12, P20) in bulk RNA-seq data. P-values from paired t-tests are shown. **e** Expression of *CD274* (PD-L1) and *PDCD1LG2* (PD-L2) in CAFs (P20, P32, P42, and CT5.3) after IL-1 $\beta$  stimulation (1 ng/ml) in bulk RNA-Seq data. P-values from two-sided paired t-tests are shown. **f** Presence of surface-bound PD-L1 protein assessed via flow cytometry in control CAFs (P4, P16 and P20) and after stimulation with IL-1 $\beta$  (1 ng/ml). Source data are provided as a Source Data file.

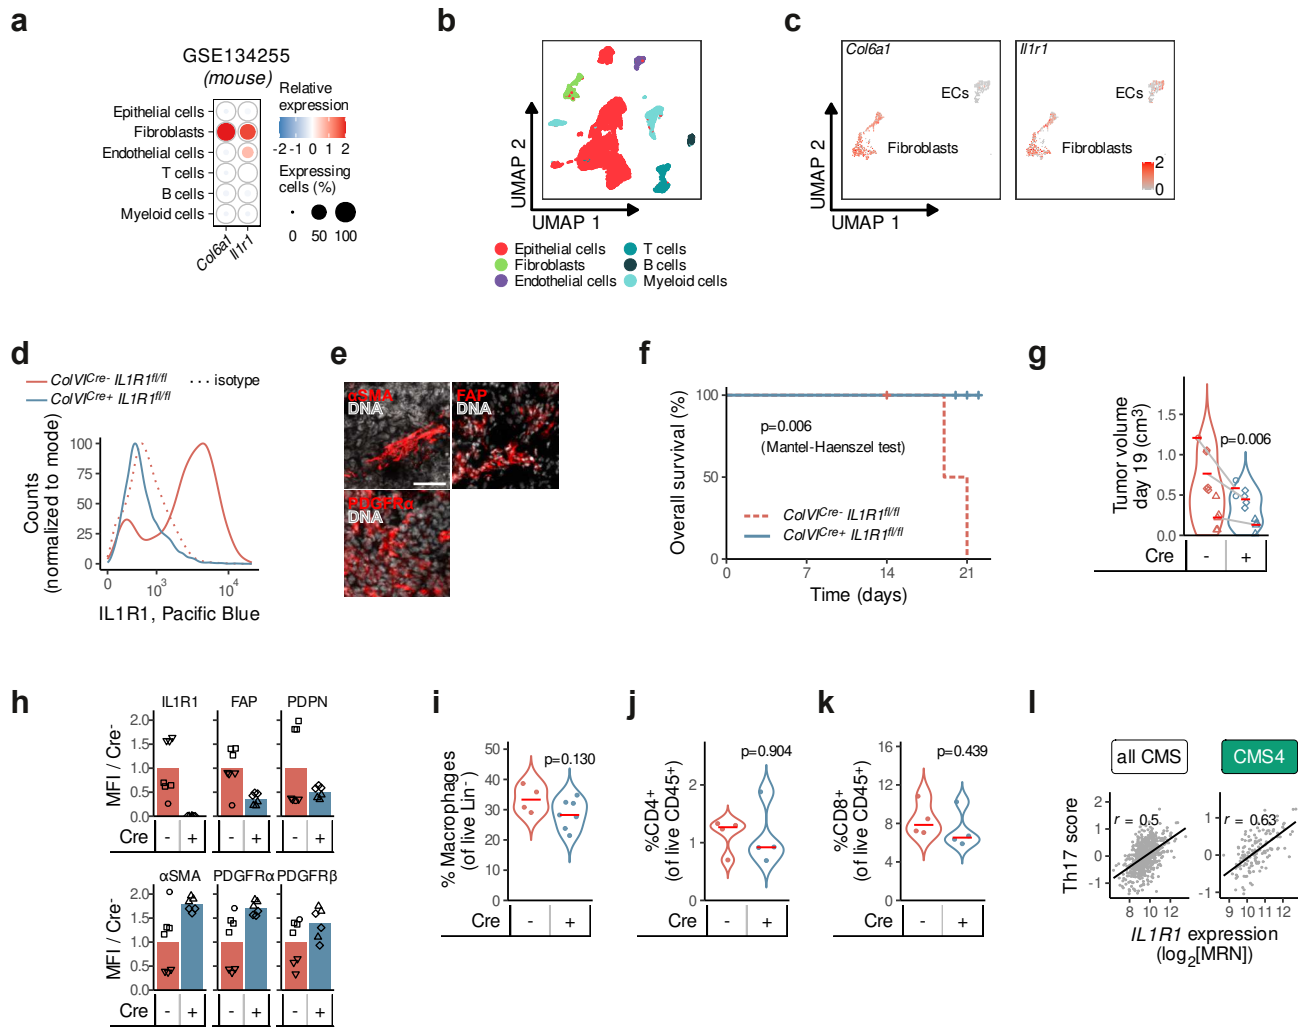

**Supplementary Figure. 8 – Effect of the IL1R1<sup>+</sup> iCAF subtype in an CRC mouse model.** **a** Fibroblast specific expression of ColVI. Heatmap showing the expression of *Col6a1* and *Il1r1* in the main cell types of the mouse scRNA-seq dataset GSE134255 (n=7 mice). **b** UMAP plot showing the main cell types in GSE134255 (n=7 mice). **c** UMAP plot showing the expression of *Col6a1* and *Il1r1* in Fibroblasts and endothelial cells (ECs) in GSE134255 (n=7 mice). **d** IL1R1 expression in skin fibroblasts from *ColVI<sup>Cre</sup>+IL1R1<sup>fl/fl</sup>* and *ColVI<sup>Cre</sup>-IL1R1<sup>fl/fl</sup>* mice as measured by flow cytometry. n=3 mice. **e** Presence of fibroblasts in MC38 tumors shown by  $\alpha$ SMA, FAP and PDGFR $\alpha$  immunofluorescence stainings as well as DAPI stained DNA content. Representative images out of n=3 tumors. Scale bar = 50  $\mu$ m. **f** Kaplan-Meier curves showing the survival of *ColVI<sup>Cre</sup>+IL1R1<sup>fl/fl</sup>* (n=6 mice) and *ColVI<sup>Cre</sup>-IL1R1<sup>fl/fl</sup>* (n=7 mice) mice subcutaneously implanted with MC38 cells. P-value from a two-sided Mantel-Haenszel test is shown. **g** Tumor volumes (cm<sup>3</sup>) at experimental endpoint from three independent experiments with n=11 mice per condition. Nested ANOVA. **h** Expression of CAF markers measured by flow-cytometry on colon fibroblasts isolated from *IL1R1* deficient (Cre<sup>+</sup>, n=2 mice with number of technical replicates shown on the graph) and control (Cre<sup>-</sup>, n=3 mice with number of technical replicates shown on the graph) group. **i-k**. Total of macrophages in **i**, CD4<sup>+</sup> cells in **j** and CD8<sup>+</sup> cells in **k** as assessed by flow cytometry. One representative experiment out of two are shown with n=4 Cre<sup>-</sup> and n=7 Cre<sup>+</sup> mice in **i** and n=4 mice per condition in **j-k**. **l** Correlation of *IL1R1* expression with Th17 scores in TCGA patients in all CMS (left panel, n=192) and CMS4 only (right panel, n=192). The Pearson's coefficient r is shown. Source data are provided as a Source Data file.

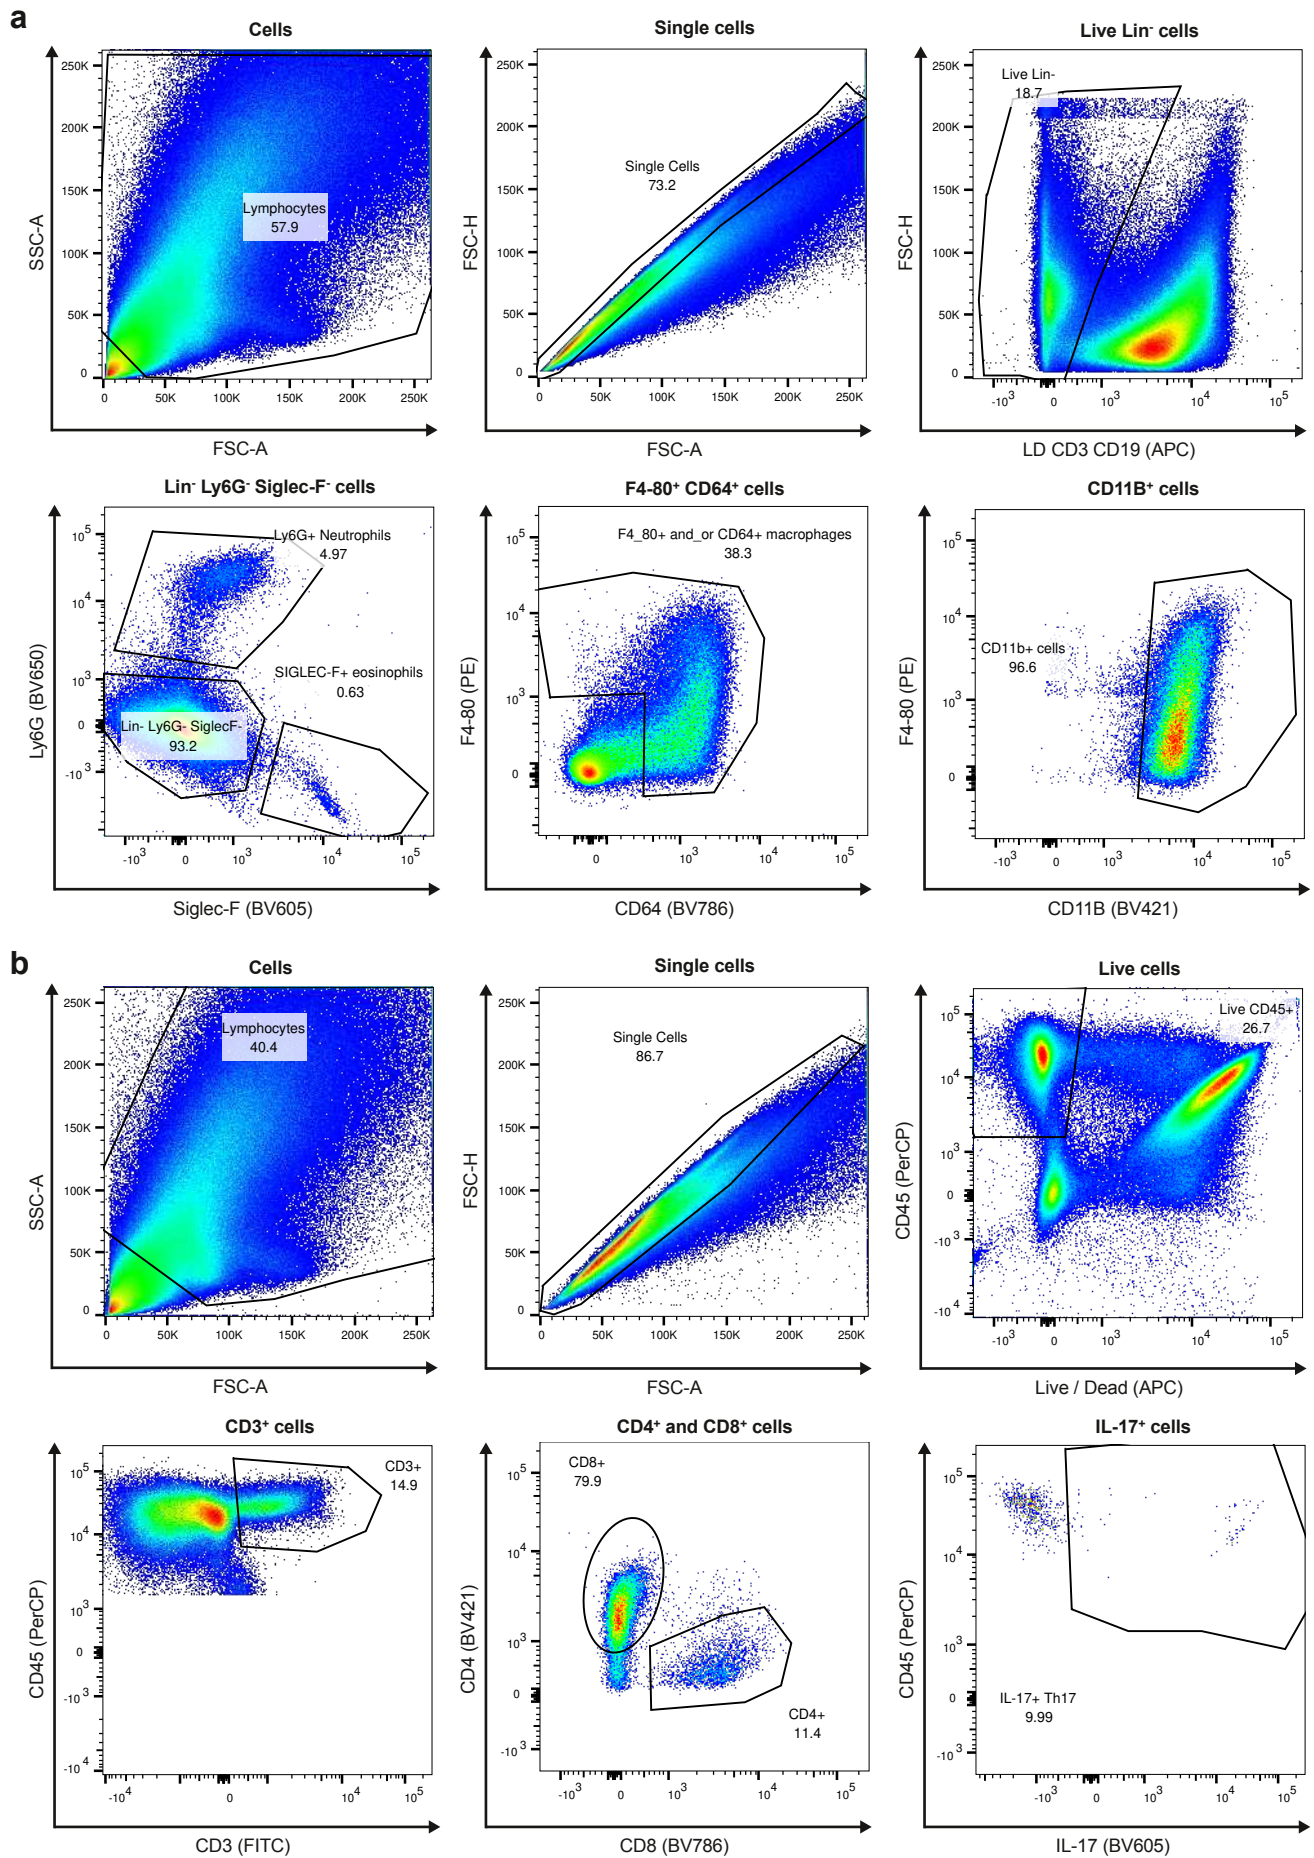

**Supplementary Figure. 9 – Representative gating strategy of macrophages and lymphocytes. a** Gating strategy for macrophages. **b** Gating strategy for CD4<sup>+</sup> and CD8<sup>+</sup> and IL-17<sup>+</sup> T-cells.

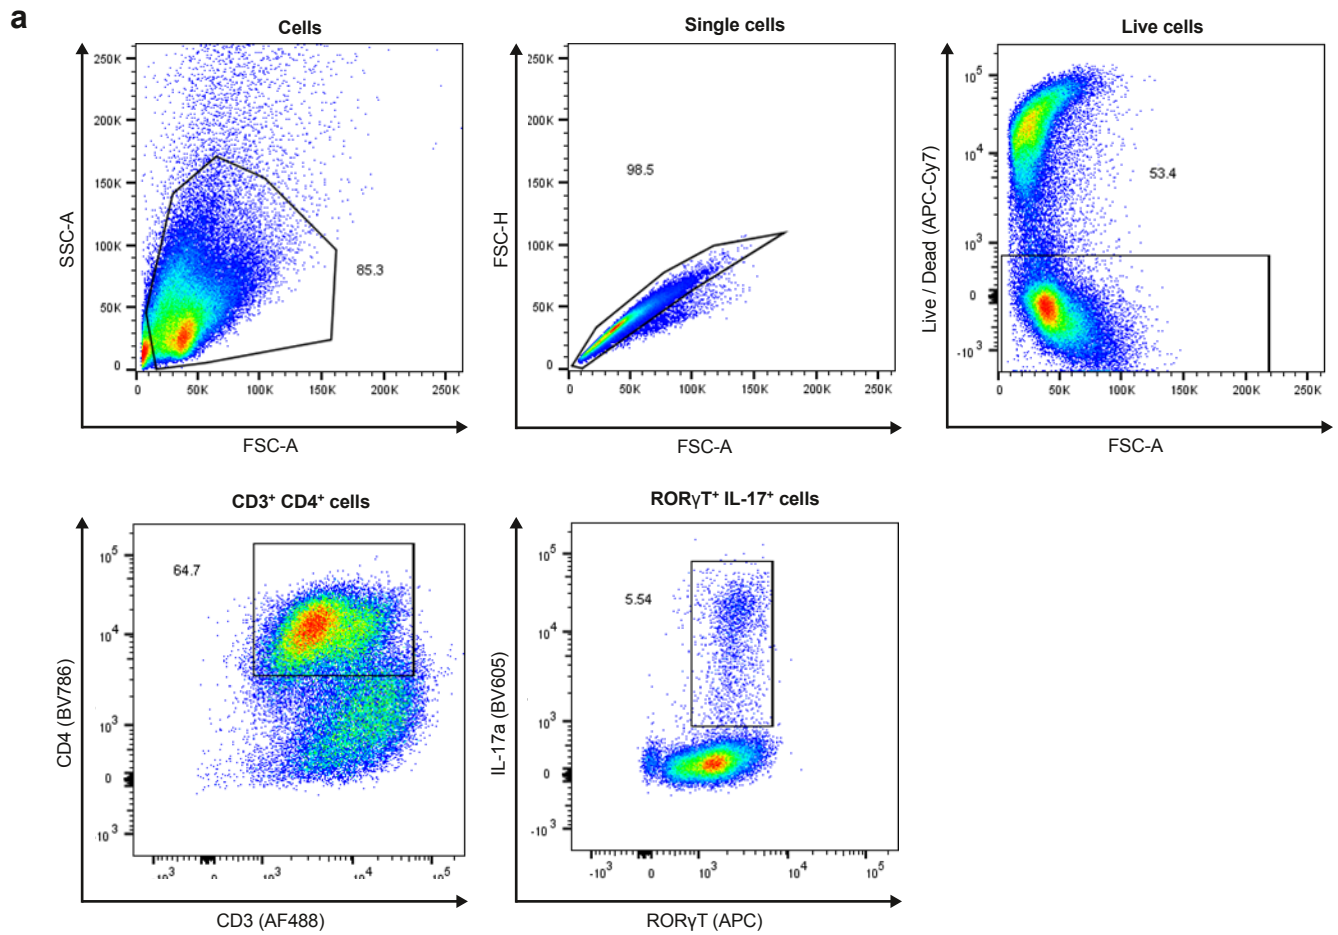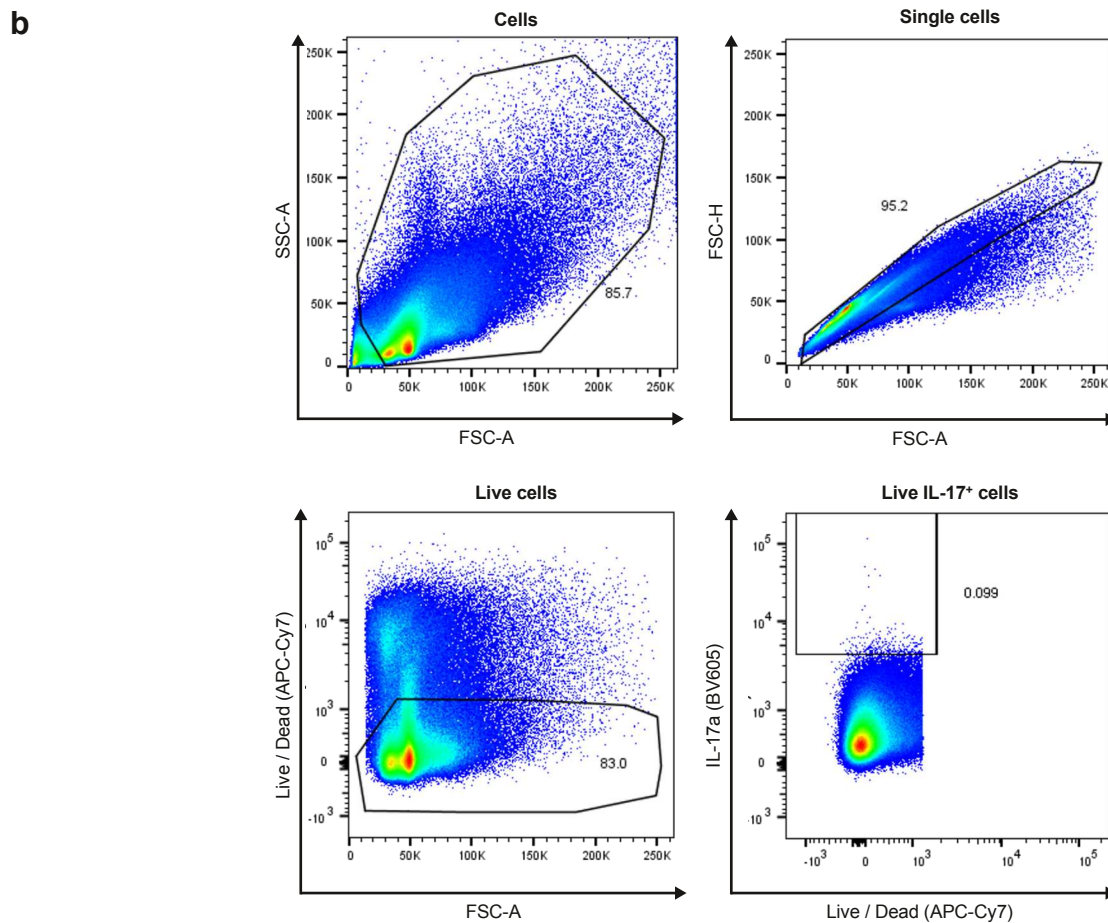

**Supplementary Figure. 10 – Representative gating strategy of IL-17<sup>+</sup> T cells. a** Gating strategy for *in-vitro* T cell differentiation. **b** Gating strategy for *in-vivo* IL-17<sup>+</sup> cells.

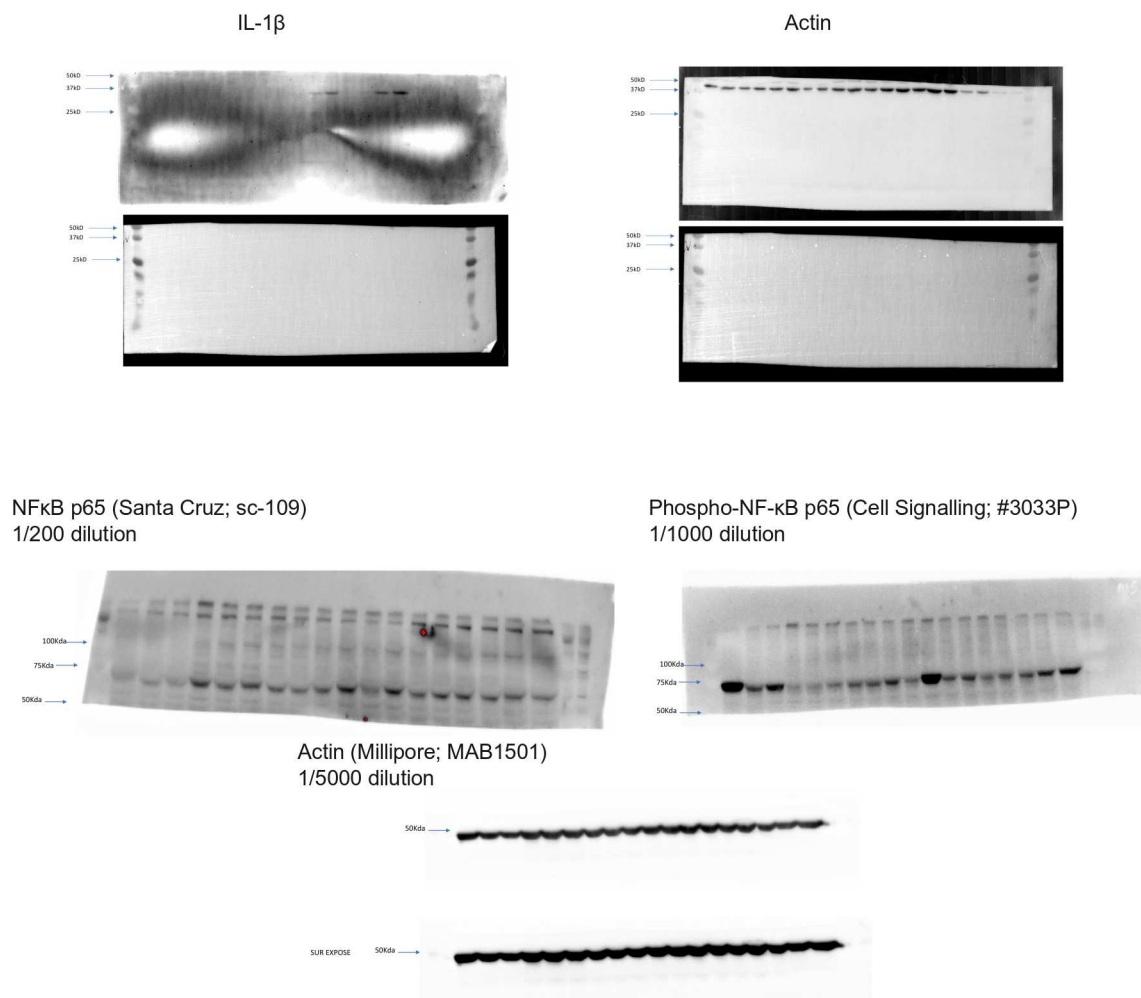

**Supplementary Figure. 11 – Uncropped western blots.** Raw western blot acquisitions shown in supplementary figure 4e.

**Supplementary Table 1 – Patient characteristics of primary tumor derived fibroblast cell lines.**

| ID    | Gender | TNM     |
|-------|--------|---------|
| P42   | Female | pT3N0M0 |
| P175  | Male   | n.a.    |
| P177  | Male   | n.a.    |
| P178  | Female | n.a.    |
| CAF-5 | Female | pT2N0M0 |
| CAF-6 | Female | pT3N0M0 |
| CAF-7 | Male   | pT2N0M0 |

**Supplementary Table 2** – Gene symbols defining the IL-1 $\beta$ , iCAF and IL1R1<sup>+</sup> iCAF signatures.

| signature                  | gene symbols                                                                                                                                                                                                                                                                                                                                                                    |
|----------------------------|---------------------------------------------------------------------------------------------------------------------------------------------------------------------------------------------------------------------------------------------------------------------------------------------------------------------------------------------------------------------------------|
| IL-1 $\beta$               | <i>CSF3, IL6, CCL20, CXCL2, CXCL8, CXCL3, CXCL10, CXCL1, SERPINB2, TNFAIP3, TNFAIP6, G0S2, EREG, CCL2, TNFAIP2, ICAM1, TNFSF15, IL1B, PTX3, IER3, ZC3H12A, INHBA, CXCL6, IL11, CXCL5, PTGS2, SLC7A2, SOD2, C11orf96, TSLP, SLC39A14, NFKB2, NAMPT, NFKBIZ, ZC3H12C, IL7R, RELB, SLC2A6, NFKBIA, NFKB1, VCAM1, RIPK2, FGF2, GFPT2, BMP2, LIF, SLC39A8, PTGES, NINJ1 and WTAP</i> |
| iCAF                       | <i>WNT5A, COL7A1, PDGFRA, CTHRC1 and CTSK</i>                                                                                                                                                                                                                                                                                                                                   |
| IL1R1 <sup>+</sup><br>iCAF | <i>FAP, PDPN, TPBG, SERPINE1, EFEMP1, PDGFRL and CLU</i>                                                                                                                                                                                                                                                                                                                        |

**Supplementary Table 3** – Descriptive statistics of our in-house CRC cohort (106 patients analysed in the TMA in Fig. 2).

| variable                  | n          |
|---------------------------|------------|
| <b>Age</b>                |            |
| ≤ 65                      | 19         |
| > 65                      | 87         |
| <b>Gender</b>             |            |
| female                    | 32         |
| male                      | 74         |
| <b>Stage</b>              |            |
| 1                         | 15         |
| 2                         | 42         |
| 3                         | 37         |
| 4                         | 10         |
| unknown                   | 2          |
| <b>Tumor localisation</b> |            |
| proximal colon            | 36         |
| distal colon              | 40         |
| rectosigmoid              | 7          |
| rectum                    | 21         |
| unknown                   | 2          |
| <b>CMS</b>                |            |
| CMS1                      | 14 (15.9%) |
| CMS2                      | 22 (25.0%) |
| CMS3                      | 11 (12.5%) |
| CMS4                      | 26 (29.5%) |
| NOLBL                     | 15 (17.0%) |
| Not subtyped              | 18         |

**Supplementary Table 4** – List of LR pairs identified by LIANA between IL1R1<sup>+</sup> iCAFs and macrophages or T cells. The 20 top-ranked LR pairs with an aggregate score < 0.05 are shown for IL1R1<sup>+</sup> iCAFs expressing the receptor (in) and the ligand (out).

| rank | Macrophages                            |                              | CD8+ T cells |                              |
|------|----------------------------------------|------------------------------|--------------|------------------------------|
|      | in                                     | out                          | in           | out                          |
| 1    | C1QB→LRP1                              | SERPINE1→PLAUR               | CCL5→ADRA2A  | <a href="#">CXCL12→CXCR4</a> |
| 2    | <a href="#">IL1B→IL1R1+IL1RAP</a>      | C3→ITGAX                     | CCL5→SDC4    | <a href="#">MXRA5→CD69</a>   |
| 3    | SPP1→ITGA5+ITGB1                       | COL1A1→CD93                  | ITGB2→THY1   | COL1A1→CD44                  |
| 4    | CD14→ITGB1                             | C3→ITGAM                     | GZMA→PARD3   | COL1A2→CD44                  |
| 5    | SPP1→ITGAV+ITGB1                       | COL1A2→CD93                  |              | COL1A1→ITGA2+ITGB1           |
| 6    | PTGS2→CAV1                             | COL1A1→CD44                  |              | COL3A1→ITGA2+ITGB1           |
| 7    | APOE→LRP1                              | C3→C3AR1                     |              | COL1A1→ITGA11+ITGB1          |
| 8    | SERPINA1→LRP1                          | COL1A2→CD44                  |              | COL1A1→ITGA3+ITGB1           |
| 9    | PSAP→LRP1                              | BGN→LY96                     |              | COL6A2→CD44                  |
| 10   | SPP1→ITGAV+ITGB5                       | APOE→TREM2                   |              | COL3A1→ITGA11+ITGB1          |
| 11   | ITGB2→THY1                             | C3→CD81                      |              | COL1A1→ITGA1+ITGB1           |
| 12   | ICAM1→CAV1                             | HP→CD163                     |              | COL1A2→ITGA2+ITGB1           |
| 13   | GNAI2→CAV1                             | DCN→TLR2                     |              | COL6A1→CD44                  |
| 14   | MMP9→LRP1                              | C3→NRP1                      |              | COL3A1→ITGA1+ITGB1           |
| 15   | <a href="#">IL1B→IL1B+IL1R1+IL1RAP</a> | COL1A1→CD36                  |              | COL1A2→ITGA11+ITGB1          |
| 16   | GRN→TNFRSF1A                           | MXRA5→PILRA                  |              | COL1A2→ITGA1+ITGB1           |
| 17   | NAMPT→ITGA5+ITGB1                      | FN1→C5AR1                    |              | COL1A2→ITGA3+ITGB1           |
| 18   | C1QB→C1QBP                             | COL6A2→CD44                  |              | CXCL12→CXCR3                 |
| 19   | SPP1→ITGA4+ITGB1                       | SPON2→ITGB2                  |              | C3→IFITM1                    |
| 20   | IL6→IL6+IL6R+IL6ST                     | HP→ITGAM                     |              | <a href="#">MYL9→CD69</a>    |
| rank | CD4+ T cells                           |                              | Tregs        |                              |
|      | in                                     | out                          | in           | out                          |
| 1    | LTB→TNFRSF1A                           | <a href="#">MXRA5→CD69</a>   | LTB→TNFRSF1A | COL1A1→CD44                  |
| 2    | CD40LG→ITGA5+ITGB1                     | <a href="#">CXCL12→CXCR4</a> |              | COL1A2→CD44                  |
| 3    |                                        | COL1A1→CD44                  |              | <a href="#">CXCL12→CXCR4</a> |
| 4    |                                        | COL1A2→CD44                  |              | <a href="#">MXRA5→CD69</a>   |
| 5    |                                        | COL1A1→ITGA11+ITGB1          |              | COL3A1→ITGA11+ITGB1          |
| 6    |                                        | COL6A2→CD44                  |              | COL1A1→ITGA11+ITGB1          |
| 7    |                                        | COL3A1→ITGA11+ITGB1          |              | COL1A1→ITGA3+ITGB1           |
| 8    |                                        | COL6A1→CD44                  |              | COL1A2→ITGA11+ITGB1          |
| 9    |                                        | COL1A2→ITGA11+ITGB1          |              | COL1A2→ITGA3+ITGB1           |
| 10   |                                        | VCAN→SELL                    |              | COL6A2→CD44                  |
| 11   |                                        | C3→IFITM1                    |              | COL6A1→CD44                  |
| 12   |                                        | APOE→SORL1                   |              | VCAN→SELL                    |
| 13   |                                        | COL3A1→ITGA1+ITGB1           |              | C3→IFITM1                    |
| 14   |                                        | COL1A1→ITGA3+ITGB1           |              | COL3A1→ITGA1+ITGB1           |
| 15   |                                        | COL3A1→ITGA2+ITGB1           |              | COL14A1→CD44                 |
| 16   |                                        | COL1A1→ITGA1+ITGB1           |              | COL1A1→ITGA1+ITGB1           |
| 17   |                                        | COL1A1→ITGA2+ITGB1           |              | THBS2→ITGA4                  |
| 18   |                                        | COL14A1→CD44                 |              | B2M→CD3D                     |
| 19   |                                        | <a href="#">MYL9→CD69</a>    |              | ICAM1→IL2RA                  |
| 20   |                                        | COL1A2→ITGA3+ITGB1           |              | ICAM1→IL2RG                  |

**Supplementary Table 5** – List of antibody references and primer sequences.

| Antibodies              | Manufacturer              | Cat No         | Dilution     | Figure      |
|-------------------------|---------------------------|----------------|--------------|-------------|
| <b>Mouse antibodies</b> |                           |                |              |             |
| IL1R1 /CD121a           | BD Biosciences            | 564387         | 1:200        | 6C, S8H     |
| Isotype control         | BD Biosciences            | 562868         | 1:200        | 6C, S8D     |
| CD3                     | BD Biosciences            | 553062         | 1:200        | 6F, S8I     |
| CD4                     | BD Biosciences            | 563727         | 1:200        | R           |
| CD8                     | BD Biosciences            | 558106         | 1:200        | 6F, S8I     |
| CD8                     | Invitrogen                | 67-0081-82     | 1:200        | 6F, S8I     |
| CD45                    | BioLegend                 | 103132         | 1:200        | 6F, S8I     |
| IL17a                   | BD Biosciences            | 564169         | 1:100        | 6F, S8I, 6K |
| CD8                     | BioLegend                 | 100712         | 1:200        | 5C          |
| CD274 (PD-L1)           | BD Biosciences            | 564715         | 1:200        | 6H          |
| ROR $\gamma$ T          | eBioscience               | 17-6981-82     | 1:100        | 6K          |
| CD3 $\epsilon$          | BioLegend                 | 100340         | 5 $\mu$ g/ml | 6G          |
| CD28                    | BioLegend                 | 102116         | 1 $\mu$ g/ml | 6G          |
| IFN- $\gamma$           | BD Pharmingen             | 554408         | 5 $\mu$ g/ml | 6G          |
| $\alpha$ SMA            | Cell Signaling            | 19245          | 1:200        | S8E, S8H    |
| PDGFR $\alpha$          | Abcam                     | ab61219        | 1:200        | S8E, S8H    |
| PDGFR $\beta$           | BioLegend                 | 136006         | 1:200        | S8H         |
| FAP                     | Abcam                     | ab218164       | 1:200        | S8E         |
| FAP                     | R&D Systems               | FAB9727R-100UG | 1:200        | S8H         |
| PDPN                    | BioLegend                 | 127422         | 1:200        | S8H         |
| aSMA                    | eBioscience               | 53-9760-82     | 1:200        | S8H         |
| PDGFRa                  | BD Biosciences            | 740148         | 1:200        | S8H         |
| CD11b                   | BioLegend                 | 101224         | 1:200        | S8I         |
| F4/80                   | ThermoFisher Scientific   | 25-4801-82     | 1:200        | S8I         |
| CD64                    | BD Biosciences            | 741024         | 1:200        | S8I         |
| Ly6G                    | BD Biosciences            | 740554         | 1:200        | S8I         |
| SIGLEC-F                | BD Biosciences            | 740388         | 1:200        | S8I         |
| CD19                    | ThermoFisher Scientific   | A15391         | 1:200        | S8I         |
| CD3 $\epsilon$          | ThermoFisher Scientific   | 47-0031-82     | 1:200        | S8I         |
| <b>Human antibodies</b> |                           |                |              |             |
| CD140a/PDGFR $\alpha$   | Abcam                     | ab124392       | 1:50         | 3H          |
| CD140b/PDGFR $\beta$    | BD Biosciences            | 564124         | 1:200        | 3H          |
| FAP                     | Abcam                     | ab53066        | 1:50 - 1:100 | 3H, S4I     |
| IL1R1                   | R&D Systems               | FAB269P        | 1:40         | 1D, S8D     |
| IL1R1                   | Abcam                     | ab106278       | 1:50 - 1:500 | 3H          |
| PDPN                    | BioLegend                 | 337014         | 1:50         | 3H, 2J      |
| CD274 (PD-L1)           | BioLegend                 | 329733         | 1:50         | 3H          |
| $\alpha$ SMA            | Invitrogen                | 53-9760-82     | 1:200        | 3H          |
| FAP                     | Abcam                     | ab53066        | 1:100        | 2H          |
| $\alpha$ SMA            | Cell Signaling Technology | 19245          | 1:500        | 2H          |
| IL-1 $\beta$            | Abcam                     | ab2105         | 1:50 - 1:200 | 2H          |

|                                 |                                |          |        |                    |
|---------------------------------|--------------------------------|----------|--------|--------------------|
| PDPN                            | BioLegend                      | 337022   | 1:50   | 2I, S4I            |
| p65                             | Cell Signaling Technology      | 8242     | 1:1000 | 3G, S4F, S4H       |
| CD140b/PDGFR $\beta$            | BioLegend                      | 323606   | 1:100  | S4I                |
| $\alpha$ SMA                    | Abcam                          | ab184675 | 1:100  | S4I                |
| CD163                           | BioLegend                      | 333608   | 1:50   | 5E                 |
| CD206                           | BioLegend                      | 321116   | 1:100  | 5E                 |
| EPCAM                           | Cell Signaling Technology      | 5488     | 1:100  | 3G, S4F, S4H       |
| VIM                             | Abcam                          | ab195878 | 1:5000 | 3G, S4F, S4H       |
| <b>Viability dye</b>            |                                |          |        |                    |
| NearIR fluorescent reactive dye | Invitrogen                     | L34967   | 1:1000 | 3H,5C, 6F-G,6K,S8H |
| <b>Western blot antibodies</b>  |                                |          |        |                    |
| phospho-NF- $\kappa$ B p65      | Cell Signaling Technology      | 3033P    | 1:1000 | S4E                |
| NF- $\kappa$ B p65              | Santa Cruz                     | sc-109   | 1:200  | S4E                |
| IL-1 $\beta$                    | Cell Signaling Technology      | 12242    | 1:1000 | S4E                |
| $\beta$ -actin                  | Millipore                      | MAB1501  | 1:5000 | S4E                |
| rabbit-HRP                      | Cell Signaling Technology      | 7074     | 1:5000 | S4E                |
| mouse-HRP                       | Cell Signaling Technology      | 7076     | 1:5000 | S4E                |
| Primers                         | Sequences                      |          |        |                    |
| IL8 - F                         | 5'-ACTCCAAACCTTTCCACCCC-3'     |          |        |                    |
| IL8 - R                         | 5'-ATTTCTGTGTTGGCGCAGTG-3'     |          |        |                    |
| IL1B - F                        | 5'-CCACAGACCTTCCAGGAGAATG-3'   |          |        |                    |
| IL1B - R                        | 5'-GTGCAGTTCAGTGATCGTACAGG-3'  |          |        |                    |
| IL6 - F                         | 5'-AGACAGCCACTCACCTCTTCAG-3'   |          |        |                    |
| IL6 - R                         | 5'-TTCTGCCAGTGCCTCTTTGCTG-3'   |          |        |                    |
| YWHAZ - F                       | 5'-ACTTTTGGTACATTGTGGCTTCAA-3' |          |        |                    |
| YWHAZ - R                       | 5'-CCGCCAGGACAAACCAGTAT-3'     |          |        |                    |
| EFF1A1 - F                      | 5'- TTGTCGTCATTGGACACGTAG-3'   |          |        |                    |
| EFF1A1 - R                      | 5'- TGCCACCGCATTTATAGATCAG-3'  |          |        |                    |
